# Supplementary material for: The gut microbial profile in patients with primary sclerosing cholangitis is distinct from patients with ulcerative colitis without biliary disease and healthy controls
Source: HighWire-hosted journal article supplement (doi:10.1136/gutjnl-2015-310500), 2016-02-17
Supplement: gutjnl-2015-310500supp_tables-new.xls [file gutjnl-2015-310500supp_tables-new.xls]

## Sheet: Table of content - Supl.tables
Table of content - Supplementary tabels
Supplementary table S1:	Overview of excluded samples by phenotype and total.
Supplementary table S2:	Demographics for the combined panel.
Supplementary table S3:	Linear regression analyses of alpha diversity (Shannon diversity index, Chao1 bacterial richness estimate [Chao1] and Phylogenetic diversity) in the combined panel, for (A) PSC versus HC, (B) PSC versus UC and (C) PSC with and without IBD.
Supplementary table S4:	The final 12 genera confirmed in the validation panel that differd between PSC and HC. Results from Mann-Whitney, linear regression, LEfSe and MaAsLin, together with the median relative abundances of each bacterial taxa in each phenotype.
Supplementary table S5:	Alpha diversity (Shannon diversity index, Chao1 bacterial richness estimate [Chao1] and Phylogenetic diversity). Comparison in the combined panel of (A) IBD-subphenotypes in PSC, (B) medication in PSC and (C ) small duct PSC, large duct PSC and HC.

## Sheet: Supplementary table S1
Supplementary table S1
Overview of excluded samples by phenotype and total.
	PSC				UC				HC					Total
	n		%		n		%		n		%			n		%
Exclusion criteria	144		100		51		100		348		100			543		100
Missing sample information	2		1.36054						16		4.5977			18		3.31492
Sampling error	1		0.680272		2		3.92157		7		2.01149			10		1.84162
Bowel resection / stoma	30		20.8333		1		1.96078							31		5.70902
Diet	7		4.7619		4		7.84314		12		3.44828			23		4.23573
Antibiotics last 4 weeks	8		5.44218		3		5.88235		5		1.43678			16		2.94659
Room temperature > 72 hours	3		2.04082		2		3.92157		20		5.74713			25		4.60405
Excluded before sequencing	51		35.119		12		23.5294		60		17.2414			123		22.6519
Excluded after sequencing (failed sequencing/low read count)	8		5.44218		3		5.88235		25		7.18391			36		6.62983
Applicable for analysis	85		59.4388		36		70.5882		263		75.5747			384		70.7182
PSC, primary sclerosing cholangitis; UC, ulcerative colitis; HC, healthy controls.

## Sheet: Supplementary table S2
Supplementary table S2
Demographics for the combined panel.
		PSC (n=85)				Healthy controls (n=263)				Ulcerative colitis (n=36)			P-value (PSC vs HC)	P-value (PSC vs UC)	P-value (UC vs HC)
Age, median years (min-max)		49		(21-82)		46		(30-61)		40		(22-69)	<0.05	<0.01	<0.05
Sex, male (%)		53		(62.4)		108		(41.1)		16		(44.4)	<0.01	0.075	0.721
BMI, median kg/m2 (min-max)		25.4		(18-38)		25.6		(18-43)		24.4		(18-34)	0.257	0.149	<0.05
Smoking, yes (%)		2		(2.4)		30		(11.4)		0			<0.01
Sample time in RT, median hours (min-max)		27		(13-63)		33		(16-72)		26		(19-71)	0.209	0.755	0.217
Courses of AB < 12 months, median (min-max)		0		(0-10)		0		(0-5)		0		(0-4)	0.466	0.159	0.24
Ulcerative colitis, n (%)		44		(51.8)		-				36		(100.0)		<0.01
Crohn's disease, n (%)		11		(12.9)		-				-
Small duct PSC		3		(3.5)
Mediacation, yes, n (%)
	PPI	6		(7.1)		18		(6.8)		2		(5.6)	1	1	1
	Antihistamines	6		(7.1)		14		(5.3)		-			0.593
	Statins	7		(8.2)		11		(4.2)		-			0.16
	Ursodeoxycholic acid	25		(29.4)		-		-		-
	Prednisolon	13		(15.3)		-		-		5		(13.9)		1
	5-ASA	35		(41.2)		-		-		29		(80.6)		<0.01
	Infliximab	1		(1.2)		-		-		14		(38.9)		<0.01
	Adalimumab					-		-		4		(11.1)
	Azathioprine	12		(14.1)		-		-		10		(27.8)		0.12
	Budesonide	3		(3.5)		-		-		2		(5.6)		0.633
PSC specific variables														Available for
	PSC Disease duration, median years (min-max)	9.1		(1-32)										N=85
	IBD duration, median years (min-max)	11.8		(0-45)										N=63
	Other autoimmune disease, yes (%)	23		(27.1)										N=80
	Mayo risk score, median (min-max)	-0.06		(-1.9-3.3)										N=64
	P-ANCA status, positive (%)	44		(51.8)										N=77
	Platelet count, 109/L, median (min-max)	223		(57-578)										N=77
	Creatinine, µmol/L, median (min-max)	68		(42-106)										N=78
	Bilirubin, µmol/L, median (min-max)	13		(3-114)										N=77
	Albumin, g/L, median (min-max)	43		(16-47)										N=72
	INR, median (min-max)	1		(0.9-1.3)										N=68
	AST, U/L, median (min-max)	45		(18-197)										N=72
	ALT, U/L, median (min-max)	56		(14-331)										N=78
	ALP, U/L, median (min-max)	170		(30-598)										N=77
	GGT, U/L, median (min-max)	184		(10-1576)										N=76
PSC, primary sclerosing cholangitis; UC, ulcerative colitis; HC, healthy controls; BMI, body mass index; RT, room temperature; AB, antibiotics; PPI, proton pump inhibitors; 5-ASA, 5-Aminosalicylic acid; IBD, inflammatory bowel disease; INR, international normalised ratio; AST, aspartate aminotransferase; ALT, alanine aminotransferase; ALP, alkaline phosphatase; GGT, gamma-glutaryltransferase.

## Sheet: Supplementary table S3
Supplementary table S3
Linear regression analyses of alpha diversity (Shannon diversity index, Chao1 bacterial richness estimate [Chao1] and Phylogenetic diversity) in the combined panel, for (A) PSC versus HC, (B) PSC versus UC and (C) PSC with and without IBD.
For the multivariate analyses sex, smoking, age and BMI were consideret obligate as covariates and all other varibels that showed an effect in the univariate analyses with a P-value<0.10 were also included as covariates. In the PSC-subgoup analyses use of antibiotics, duration of PSC and duration of IBD were also conisdered obligate as covariates. Bilirubin, ALP, AST, ALT, and GGT were transforme…
PSC, primary sclerosing cholangitis; HC, healthy controls; UC, ulcerative colitis; BMI, body mass index; AB, antibiotics; RT, room temperature; IBD, inflammatory bowel disease; PPI, proton pump inhibitors; PSC+IBD, PSC with inflammatory bowel disease; 5-ASA, 5-Aminosalicylic acid; INR, international normalised ratio; AST, aspartate aminotransferase; ALT, alanine aminotransferase; ALP, alkaline ph…
A)
	Shannon diversity index - PSC vs HC
	Unadjusted				Adjusted
	Beta	(95% CI)	P-value		Beta	(95% CI)	P-value
PSC	-0.653566	(-0.8, -0.5)	4.49005e-16		-0.674914	(-0.8, -0.5)	4.3417e-16
Sex (male)	0.128607	(-0.01, 0.27)	0.076038		0.0447637	(-0.09, 0.18)	0.504603
Smoking (yes)	0.0610982	(-0.19, 0.31)	0.625942		-0.0771097	(-0.3, 0.1)	0.500468
Age	0.00453163	(-0.005, 0.01)	0.279283		0.00845253	(0.001, 0.02)	0.0283629
BMI	-0.0108277	(-0.03, 0.01)	0.230575		-0.0143256	(-0.03, 0.002)	0.0873922
Courses of AB < 12 months	-0.0958526	(-0.17, -0.02)	0.0167749		-0.0579357	(-0.13, 0.02)	0.120533
Sample time in RT	0.00358886	(-0.002, 0.01)	0.239185
Statins (yes)	-0.227877	(-0.55, 0.09)	0.162981
PPI (yes)	-0.00259761	(-0.3, 0.3)	0.985503
Antihistamines (yes)	-0.0541055	(-0.4, 0.3)	0.728106
	Phylogenetic diversity - PSC vs HC
	Unadjusted				Adjusted
	Beta	(95% CI)	P-value		Beta	(95% CI)	P-value
PSC	-4.21497	(-5.2, -3.2)	1.66373e-14		-4.28058	(-5.3, -3.2)	2.90406e-14
Sex (male)	0.763048	(-0.2, 1.7)	0.121473		0.280904	(-0.6, 1.2)	0.539447
Smoking (yes)	0.381112	(-1.3, 2.1)	0.654479		-0.498829	(-2.0, 1.0)	0.52299
Age	0.0132246	(-0.04, 0.07)	0.642333		0.0344268	(-0.02, 0.09)	0.189708
BMI	-0.109634	(-0.2, 0.01)	0.0735972		-0.119193	(-0.2, -0.01)	0.0373426
Courses of AB < 12 months	-0.914149	(-1.4, -0.4)	0.000748699		-0.674699	(-1.2, -0.2)	0.00827378
Sample time in RT	0.0336916	(-0.01, 0.07)	0.103528
Statins (yes)	-0.721821	(-2.9, 1.5)	0.515839
PPI (yes)	-0.425844	(-2.3, 1.5)	0.661005
Antihistamines (yes)	-0.175116	(-2.3, 1.9)	0.868462
	Chao1 - PSC vs HC
	Unadjusted				Adjusted
	Beta	(95% CI)	P-value		Beta	(95% CI)	P-value
PSC	-90.0714	(-110.4, -69.7)	1.42609e-16		-91.4264	(-112.4, -70.4)	3.64977e-16
Sex (male)	12.9972	(-6.3, 32.3)	0.186945		1.62262	(-16.2, 19.4)	0.857848
Smoking (yes)	8.57522	(-24.9, 42.0)	0.614223		-9.62216	(-40.0, 20.8)	0.533653
Age	0.115157	(-1.0, 1.2)	0.839604		0.561614	(-0.5, 1.6)	0.279605
BMI	-1.49096	(-3.9, 0.9)	0.223866		-1.63524	(-3.9, 0.6)	0.148362
Courses of AB < 12 months	-18.089	(-28.7, -7.5)	0.000842909		-13.7582	(-23.6, -3.9)	0.00653978
Sample time in RT	0.57974	(-0.2, 1.4)	0.161083
Statins (yes)	-9.69419	(-53.3, 33.9)	0.662318
PPI (yes)	-13.5915	(-51.7, 24.5)	0.483489
Antihistamines (yes)	-1.75422	(-43.3, 39.8)	0.933822
B)
	Shannon diversity index - PSC vs UC
	Unadjusted				Adjusted
	Beta	(95% CI)	P-value		Beta	(95% CI)	P-value
PSC	-0.0338083	(-0.3, 0.2)	0.805846		0.0155721	(-0.3, 0.3)	0.911306
Sex (male)	0.179353	(-0.1, 0.4)	0.156266		0.164452	(-0.1, 0.4)	0.189034
Smoking (yes)	-0.229721	(-1.2, 0.7)	0.641274		-0.0340548	(-1.0, 0.9)	0.943531
Age	0.00312318	(-0.01, 0.01)	0.511645		0.00496699	(-0.01, 0.01)	0.301075
BMI	-0.052839	(-0.09, 0.02)	0.00138944		-0.054803	(-0.09, -0.02)	0.00117144
Courses of AB < 12 months	-0.0646584	(-0.16, 0.03)	0.198452
Sample time in RT	0.00399431	(-0.01, 0.01)	0.448277
Statins (yes)	0.0819955	(-0.5, 0.6)	0.760795
PPI (yes)	-0.158707	(-0.7, 0.3)	0.530284
Antihistamines (yes)	-0.373322	(-0.9, 0.2)	0.195947
	Phylogenetic diversity - PSC vs UC
	Unadjusted				Adjusted
	Beta	(95% CI)	P-value		Beta	(95% CI)	P-value
PSC	1.33465	(-0.4, 3.1)	0.134909		1.53136	(-0.3, 3.3)	0.0970381
Sex (male)	1.16438	(-0.5, 2.8)	0.158061		1.41816	(-0.2, 3.1)	0.0878532
Smoking (yes)	-2.65657	(-9.0, 3.7)	0.408126		-0.394774	(-7.0, 6.2)	0.906003
Age	0.045179	(-0.02, 0.11)	0.143934		0.035193	(-0.03, 0.1)	0.265244
BMI	-0.189395	(-0.40, 0.03)	0.0834325		-0.185137	(-0.41, 0.04)	0.099031
Courses of AB < 12 months	-0.601909	(-1.2, 0.04)	0.0653563		-0.485951	(-1.2, 0.2)	0.166788
Sample time in RT	0.0396458	(-0.03, 0.11)	0.247592
Statins (yes)	1.80142	(-1.7, 5.3)	0.30399
PPI (yes)	-1.72167	(-5.0, 1.5)	0.295699
Antihistamines (yes)	-0.934691	(-4.7, 2.8)	0.620532
	Chao1 - PSC vs UC
	Unadjusted				Adjusted
	Beta	(95% CI)	P-value		Beta	(95% CI)	P-value
PSC	27.8044	(-7.43, 63.0)	0.120815		32.0322	(-4.6, 68.6)	0.0857933
Sex (male)	20.6238	(-12.0, 53.3)	0.213576		26.7739	(-6.2, 59.7)	0.110283
Smoking (yes)	-50.6665	(-178.0, 76.6)	0.432197		-3.31791	(-136.8, 130.1)	0.960805
Age	0.745451	(-0.48, 1.97)	0.230606		0.496647	(-0.8, 1.8)	0.435622
BMI	-3.18883	(-7.5, 1.1)	0.147465		-2.88892	(-7.3, 1.6)	0.201369
Courses of AB < 12 months	-13.1386	(-26.0, -0.30)	0.0449028		-11.6071	(-25.6, 2.4)	0.102566
Sample time in RT	0.731993	(-0.6, 2.1)	0.288015
Statins (yes)	39.1557	(-30.2, 108.5)	0.265738
PPI (yes)	-48.5203	(-113.4, 16.4)	0.141371
Antihistamines (yes)	-24.5611	(-99.4, 50.3)	0.516967
C)
	Shannon diversity index - PSC only - PSC+IBD vs PSC without IBD
	Unadjusted				Adjusted
	Beta	(95% CI)	P-value		Beta	(95% CI)	P-value
PSC+IBD	0.0969482	(-0.23, 0.42)	0.552527		0.0557827	(-0.5, 0.6)	0.850082
Sex (male)	0.0288935	(-0.3, 0.3)	0.857702		-0.00271624	(-0.5, 0.5)	0.991682
Smoking (yes)	-0.221067	(-1.2, 0.8)	0.667645		0.0245046	(-1.2, 1.3)	0.96821
Age	0.00643722	(-0.01, 0.02)	0.31107		0.00737792	(-0.02, 0.03)	0.527353
BMI	-0.0463874	(-0.09, 0.01)	0.0200278		-0.0253339	(-0.09, 0.04)	0.42058
Courses of AB < 12 months	-0.0574505	(-0.2, 0.1)	0.302742		-0.0350797	(-0.2, 0.1)	0.639812
Sample time in RT	0.00742221	(-0.01, 0.02)	0.2873
Statins (yes)	0.0951462	(-0.5, 0.7)	0.737558
PPI (yes)	0.0610463	(-0.5, 0.7)	0.841266
Antihistamines (yes)	-0.370935	(-1.0, 0.2)	0.221596
Ursodeoxycholic acid (yes)	-0.182224	(-0.5, 0.2)	0.285962
Cholestyramine (yes)	-0.118678	(-0.8, 0.6)	0.747483
Prednisolon (yes)	0.0984006	(-0.3, 0.5)	0.649923
5-ASA (yes)	-0.175787	(-0.5, 0.1)	0.266081
Infliximab (yes)	-0.316148	(-1.8, 1.1)	0.66224
Azathioprine (yes)	-0.0827836	(-0.5, 0.4)	0.711891
Budesonide (yes)	0.316695	(-0.5, 1.2)	0.453451
Platelets	-0.000267947	(-0.002, 0.002)	0.767635
Creatinine	0.0011138	(-0.01, 0.01)	0.850703
Total bilirubin	0.0602908	(-0.2, 0.3)	0.625188
Albumin	-0.0174045	(-0.05, 0.02)	0.315625
INR	2.08236	(0.3, 3.9)	0.0245797		2.04658	(-0.4, 4.5)	0.0953643
AST	0.0095847	(-0.3, 0.3)	0.945804
ALT	0.00511871	(-0.2, 0.2)	0.958974
ALP	-0.110798	(-0.3, 0.1)	0.335931
GGT	0.0014188	(-0.1, 0.1)	0.983354
P-ANCA (positive)	-0.0343793	(-0.4, 0.3)	0.834872
Other autimmune disease (yes)	0.228088	(-0.1, 0.6)	0.201751
MAYO risk score	0.0406408	(-0.1, 0.2)	0.663513
Time from PSC diagnosis	-0.000420989	(-0.002, 0.001)	0.631087		-0.000558536	(-0.003, 0.002)	0.666048
Time from IBD diagnosis	-0.000659289	(-0.002, 0.001)	0.295585		-0.00120645	(-0.003, 0.001)	0.174703
	Phylogenetic diversity - PSC only - PSC without IBD
	Unadjusted				Adjusted
	Beta	(95% CI)	P-value		Beta	(95% CI)	P-value
PSC+IBD	0.0262606	(-2.0, 2.1)	0.97991		0.0181125	(-3.7, 3.8)	0.99229
Sex (male)	1.05123	(-1.0, 3.1)	0.305246		1.06645	(-2.3, 4.4)	0.520431
Smoking (yes)	-3.08227	(-9.6, 3.4)	0.347223		-1.67567	(-9.5, 6.2)	0.668257
Age	0.0479701	(-0.03, 0.13)	0.236385		0.0194763	(-0.1, 0.2)	0.7924
BMI	-0.227098	(-0.48, 0.03)	0.0764114		-0.208825	(-0.6, 0.2)	0.297271
Courses of AB < 12 months	-0.500344	(-1.2, 0.2)	0.158479		-0.135465	(-1.1, 0.8)	0.775858
Sample time in RT	0.0585195	(-0.03, 0.15)	0.187889
Statins (yes)	1.4168	(-2.2, 5.0)	0.433643
PPI (yes)	-0.19239	(-4.1, 3.7)	0.921231
Antihistamines (yes)	-1.38306	(-5.2, 2.5)	0.476513
Ursodeoxycholic acid (yes)	-0.853122	(-3.0, 1.3)	0.434543
Cholestyramine (yes)	-0.298374	(-5.0, 4.4)	0.899105
Prednisolon (yes)	0.623543	(2.1, 3.4)	0.652265
5-ASA (yes)	-1.42724	(-3.4, 0.6)	0.156171
Infliximab (yes)	-5.21386	(-14.3, 3.9)	0.257442
Azathioprine (yes)	-1.41524	(-4.2, 1.4)	0.321309
Budesonide (yes)	3.5623	(-1.7, 8.9)	0.184838
Platelets	-0.00380763	(-0.02, 0.01)	0.51358
Creatinine	-0.000182641	(-0.08, 0.08)	0.996164
Total bilirubin	0.106098	(-1.5, 1.7)	0.893542
Albumin	-0.104496	(-0.3, 0.1)	0.344804
INR	11.1689	(-0.3, 22.7)	0.0570274		10.2797	(-5.1, 25.7)	0.18447
AST	0.331037	(-1.4, 2.1)	0.709279
ALT	0.445045	(-0.01, 0.02)	0.485262
ALP	-0.0904094	(-1.6, 1.4)	0.902978
GGT	0.240861	(-0.6, 1.1)	0.583543
P-ANCA (positive)	-0.0599449	(-2.2, 2.0)	0.954786
Other autimmune disease (yes)	1.29147	(-1.0, 3.5)	0.255282
MAYO risk score	0.039223	(-1.1, 1.2)	0.946088
Time from PSC diagnosis	0.00196816	(-0.01, 0.01)	0.72512		0.00624472	(-0.01, 0.02)	0.448575
Time from IBD diagnosis	-0.00434723	(-0.01, 0.004)	0.281902		-0.00791227	(-0.02, 0.003)	0.161443
	Chao1 - PSC only - PSC+IBD vs PSC without IBD
	Unadjusted				Adjusted
	Beta	(95% CI)	P-value		Beta	(95% CI)	P-value
PSC+IBD	-9.06353	(-50.7, 32.5)	0.665894		-11.9695	(-93.6, 69.7)	0.768576
Sex (male)	22.9262	(-17.8, 63.7)	0.266634		16.863	(-52.8, 86.6)	0.627548
Smoking (yes)	-59.5014	(-190.2, 71.2)	0.367686		-30.2692	(-187.6, 127.1)	0.699472
Age	0.774999	(-0.8, 2.4)	0.342917		0.282914	(-2.7, 3.2)	0.846982
BMI	-3.86938	(-9.0, 1.2)	0.134923		-2.37048	(-11.3, 6.5)	0.592488
Courses of AB < 12 months	-10.912	(-25.0, 3.1)	0.126336		-6.06835	(-26.1, 14.0)	0.54379
Sample time in RT	1.02228	(-0.7, 2.8)	0.253977
Statins (yes)	31.1865	(-40.9, 103.3)	0.391954
PPI (yes)	-20.183	(-97.8, 57.4)	0.606218
Antihistamines (yes)	-34.0167	(-111.4, 43.3)	0.38425
Ursodeoxycholic acid (yes)	-5.38164	(-49.0, 38.3)	0.806954
Cholestyramine (yes)	0.564968	(-93.4, 94.6)	0.990489
Prednisolon (yes)	8.30899	(-47.0, 63.6)	0.765664
5-ASA (yes)	-33.9381	(-73.7, 5.8)	0.0932705		-21.3981	(-92.1, 49.3)	0.544324
Infliximab (yes)	-76.2126	(-260.0, 107.6)	0.411973
Azathioprine (yes)	-30.0157	(-86.8, 26.8)	0.296126
Budesonide (yes)	62.7755	(-44.2, 169.8)	0.246535
Platelets	-0.068544	(-0.3, 0.2)	0.563069
Creatinine	-0.493017	(-2.0, 1.0)	0.52265
Total bilirubin	7.12098	(-24.8, 39.1)	0.658396
Albumin	-2.03999	(-6.5, 2.5)	0.368532
INR	197.338	(-38.5, 433.2)	0.0995825		238.935	(-67.1, 544.9)	0.122412
AST	6.42904	(-29.4, 42.3)	0.721728
ALT	8.11326	(-17.6, 33.8)	0.53155
ALP	-0.753136	(-30.7, 29.2)	0.960152
GGT	4.43041	(-13.3, 22.2)	0.619955
P-ANCA (positive)	2.85803	(-40.2, 45.9)	0.895134
Other autimmune disease (yes)	23.3049	(-22.1, 68.7)	0.309576
MAYO risk score	1.88973	(-22.0, 25.8)	0.874976
Time from PSC diagnosis	0.0882969	(-0.1, 0.3)	0.432778		0.180391	(-0.1, 0.5)	0.275443
Time from IBD diagnosis	-0.128866	(-0.3, 0.03)	0.107818		-0.187342	(-0.4, 0.04)	0.0985541

## Sheet: Supplementary table S4
Supplementary table S4
The final 12 genera confirmed in the validation panel that differd between PSC and HC. Results from Mann-Whitney, linear regression, LEfSe and MaAsLin, together with the median relative abundances of each bacterial taxa in each phenotype. In the linear regression analyses age, sex, smoking status, BMI and number of prescriptions for antibiotics the last 12 months before inclusion were used as cov…
PSC, primary sclerosing cholangitis; UC, ulcerative colitis; HC, healthy controls; LDA, linear discriminant analysis score; DC, discriminatory class; ns., nonsignificant.
			Exploration panel - Mann-Whitney (PSC vs HC)						Validation panel - Mann-Whitney (PSC vs HC)												Combined panel																								Median relative abundances
															Mann-Whitney (PSC vs UC)						Linear regression (PSC vs HC)*						LEfSe (PSC vs HC)						LEfSe (PSC vs UC)						MaAsLin (PSC vs HC)*						Exploration panel				Validation panel
Order	Family	Genus	Increased in		P-value		Q-FDR		Increased in		P-value		Q-FDR		Increased in		P-value		Q-FDR		P-value		Q-FDR		Beta		DC		LDA		P-value		DC		LDA		P-value		P-value		q-value		Coefficient		HC		PSC		HC
Bacteroidales	S24.7	[unknown]	HC		0.00992687		0.080904		HC		0.00215393		0.0131629				ns.				0.00548136		0.0198997		-0.0243223		HC		2.74033		5.96717e-05						ns.		0.00414094		0.0248457		-0.0249263		0		0		0
YS2	[unknown]	[unknown]	HC		0.00318186		0.0432203		HC		0.00787331		0.0333102				ns.				0.000359471		0.00300158		-0.0158614		HC		2.83176		7.1358e-05						ns.		4.70934e-05		0.00122443		-0.014176		4.4735e-05		0		0
Clostridiales	[unknown]	[unknown]	HC		0.00190114		0.0432203		HC		0.0020859		0.0131629				ns.				3.78067e-06		6.31372e-05		-0.0580933		HC		3.37052		9.9526e-06						ns.		1.77044e-07		6.90472e-06		-0.0648334		0.0613823		0.0345726		0.0589332
Clostridiales	Christensenellaceae	[unknown]	HC		0.0015629		0.0432203		HC		0.00073605		0.0101207				ns.				0.000983939		0.00566613		-0.0170272		HC		2.35215		3.1792e-06						ns.		0.00068689		0.00765392		-0.0135436		0.00082704		0.00022743		0.00100334
Clostridiales	Lachnospiraceae	[unknown]	HC		0.0192949		0.104836		HC		0.0154626		0.0622276				ns.				0.000859084		0.00531359		-0.0322615		HC		3.19274		0.000803368						ns.		0.000328261		0.00426739		-0.0339179		0.0814182		0.059557		0.0825461
Clostridiales	Lachnospiraceae	Coprococcus	HC		0.000275897		0.0149904		HC		0.000588358		0.0101207				ns.				1.91086e-07		6.38227e-06		-0.0462826		HC		3.00505		3.48101e-07						ns.		7.06346e-08		5.5095e-06		-0.0468438		0.0157814		0.00431092		0.00960404
Clostridiales	Veillonellaceae	Phascolarctobacterium	HC		0.0133797		0.102053		HC		0.0338103		0.116223				ns.				0.00465524		0.0180797		-0.0306593		HC		2.80477		0.00113857						ns.		0.00247698		0.0175641		-0.0319247		0.000255195		0		0.00040772
Clostridiales	Veillonellaceae	Veillonella	PSC		0.0287606		0.140122		PSC		0.000733988		0.0101207		PSC		0.0107448		0.176214		0.000487319		0.00387535		0.0174353		PSC		2.50219		6.07098e-05		PSC		2.6332		0.00763587		0.00676308		0.0342936		0.00490763		0.0001066		0.00031689		0.00019144
RF32	[unknown]	[unknown]	HC		0.0174704		0.102053		HC		0.00138268		0.0126746				ns.				0.00124776		0.00631441		-0.0269969		HC		2.45338		6.02376e-05						ns.		0.000203287		0.00355354		-0.025703		0.00138109		5.391e-05		0.00205392
Desulfovibrionales	Desulfovibrionaceae	Desulfovibrio	HC		0.0177333		0.102053		HC		0.017719		0.0696103				ns.				0.00738735		0.0257018		-0.0109529						ns.						ns.		0.00893851		0.041012		-0.00930454		0		0		0
Aeromonadales	Succinivibrionaceae	Succinivibrio	HC		0.0160509		0.102053		HC		0.0100161		0.0413165				ns.				ns.						HC		2.4597		0.000458665						ns.				ns.				0		0		0
ML615J-28	[unknown]	[unknown]	HC		0.0326613		0.140122		HC		0.000123051		0.00383412				ns.				0.00330499		0.0141521		-0.0081255						ns.						ns.		0.000227791		0.00355354		-0.00617036		0		0		2.102e-05
*Covariates: age, sex, smoking status, BMI and number of prescriptions for antibiotics the last 12 months before inclusion.
LEfSe reference:	Segata N, Izard J, Waldron L, et al. Metagenomic biomarker discovery and explanation. Genome Biol 2011;12:R60. doi:10.1186/gb-2011-12-6-r60 [published Online First: 24 June 2011].
MaAsLin reference:	Morgan XC, Tickle TL, Sokol H, et al. Dysfunction of the intestinal microbiome in inflammatory bowel disease and treatment. Genome Biol 2012;13:R79. doi:10.1186/gb-2012-13-9-r79 [published Online First: 26 September 2012].

## Sheet: Supplementary table S5
Supplementary table S5
Alpha diversity. Comparison in the combined panel of alpha diversity (Shannon diversity index, Chao1 bacterial richness estimate [Chao1] and Phylogenetic diversity), in: (A) IBD-subphenotypes in PSC, (B) medication in PSC and (C ) small duct PSC, large duct PSC and HC. Significant P-values (<0.05) in bold.
PSC, primary sclerosing cholangitis; IBD, inflammatory bowel disease, PSC+IBD, PSC with inflammatory bowel disease; UC, ulcerative colitis; CD, Crohn's disease; HC, healthy controls.
A)	PSC		PSC (no IBD)				PSC+IBD					PSC-UC					PSC-CD						UC			HC
	n	%	n	%			n	%				n	%				n	%					n	%		n	%
Of total:	85	22.1	30	8.22622			55	14.91				44	11.5				11	2.9					36	9.4		263	68.5
Within PSC:	85	100	30	35.5556			55	64.7				44	51.8				11	12.9					-			-
Within PSC+IBD:	-		-				55	100				44	80				11	20					-			-
Alpha diversity measure	median	range	median	range	P-value vs HC	P-value vs UC	median	range	P-value vs PSC (no IBD)	P-value vs HC	P-value vs UC	median	range	P-value vs PSC (no IBD)	P-value vs HC	P-value vs UC	median	range	P-value vs PSC (no IBD)	P-value vs HC	P-value vs UC	P-value vs PSC-UC	median	range	P-value vs HC	median	range
Phylogenetic diversity	20.8	22.1	20.2	15.1	4.5913e-08	0.23	21.1	22.1	0.79	1.0879e-08	0.16	20	20	0.8	3.7947e-08	0.38	21.9	21.3	0.12	0.034	0.04	0.33	19.8953	18.3305	1.0957e-11	25.1506	20.3923
Shannon diversity index	5.5	3	5.5	2.5	3.7291e-11	0.44	5.5	3.5	0.37	1.0994e-08	0.78	5.5	3.3	0.46	6.5248e-08	0.9	5.7	2.7	0.38	0.021	0.611	0.067	5.64824	2.52297	2.91842e-08	6.21633	3.0043
Chao1	366.2	472.7	357.4	338.3	8.2437e-08	0.21	379.5	472.7	0.94	3.04e-11	0.14	356.4	400.4	0.57	1.2399e-10	0.42	401.4	425.4	0.2	0.016	0.013	0.15	361.688	370.56	5.58062e-14	466.284	478.756
B)	5-Aminosalicylic acid						Ursodeoxycholic acid						Prednisolon						Azathioprine						Proton pump inhibitors
	Yes			No			Yes			No			Yes			No			Yes			No			Yes			No
	n	%		n	%		n	%		n	%		n	%		n	%		n	%		n	%		n	%		n	%
Alpha diversity measure	35	41.1765		50	58.8235		25	29.4118		60	70.5882		13	15.2941		72	84.7059		12	14.1176		73	85.8824		6	7.05882		79	92.9412
	median	range		median	range	P-value	median	range		median	range	P-value	median	range		median	range	P-value	median	range		median	range	P-value	median	range		median	range	P-value
Phylogenetic diversity	19.3	19.7		21.1	22.1	0.16	19.9	15.1		21.2	22.1	0.5	19.8	18.2		20.9	21.5	0.88	19.6	22.1		21	19.3	0.42	22.3	10.83		20.66	22.1	0.89
Shannon diversity index	5.4	3.5		5.6	2.9	0.34	5.4	2.7		5.6	3.5	0.32	5.5	3.3		5.5	3.4	0.81	5.5	3.3		5.5	3.4	0.8	5.7	1.3		5.5	3.5	0.9
Chao1	349	359.9		383.6	472.7	0.09	359.8	323.4		381.7	472.7	0.84	353.9	367.5		372.8	472.7	0.96	366.3	439.7		366.2	399.2	0.55	382.1	237.5		366.2	472.7	0.85
	Statins						Antihistamins						Cholestyramine						Medication (any)
	Yes			No			Yes			No			Yes			No			Yes			No
	n	%		n	%		n	%		n	%		n	%		n	%		n	%		n	%
Alpha diversity measure	7	8.23529		78	91.7647		6	7.05882		79	92.9412		4	4.7		81	95.3		12	14.1176		73	85.8824
	median	range		median	range	P-value	median	range		median	range	P-value	median	range		median	range	P-value	median	range		median	range	P-value
Phylogenetic diversity	22.2	12.8		20.7	22.1	0.47	18.9	4.7		21.1	22.1	0.35	20.8	9.1		20.8	22.1	0.87	20.7	22.1		21.6	15.2	0.43
Shannon diversity index	5.7	1.7		5.5	3.5	0.68	5.3	2		5.6	3.5	0.23	5.4	1.5		5.5	3.5	0.76	5.5	3.5		5.7	2.3	0.31
Chao1	413	233.8		364.7	472.7	0.4	331	102.3		379.5	472.7	0.22	395.1	141.1		363.2	472.7	0.98	366.2	465.3		370.7	345.7	0.61
C)		Phylogenetic diversity			Chao1				Shannon diversity Index
	N	Median	P-value*		Median		P-value*		Median		P-value*
Healthy controls	263	25.15	0.91		466.28		0.673		6.22		0.421
Large duct PSC	82	20.09	0.121		355.06		0.139		5.51		0.464
Small duct PSC	3	22.68			401.05				5.56
*P-value versus small duct PSC
